# Supplementary material for: Profiling of core fucosylated N-glycans using a novel bacterial lectin that specifically recognizes α1,6 fucosylated chitobiose
Source: PubMed Central journal article supplement (PMC5039751; doi:10.1038/srep34195), 2016-09-28
Supplement: srep34195-s1.pdf [file srep34195-s1.pdf]

## **Supplementary Information**

### **Profiling of core fucosylated N-glycans using a novel bacterial lectin that specifically recognizes $\alpha$ 1,6 fucosylated chitobiose**

Saulius Vainauskas<sup>1</sup>, Rebecca M. Duke<sup>1,2</sup>, James McFarland<sup>1</sup>, Colleen McClung<sup>1</sup>, Cristian Ruse<sup>1</sup> and Christopher H. Taron<sup>1,\*</sup>

<sup>1</sup> New England Biolabs, 240 County Road, Ipswich, MA 01938, USA

<sup>2</sup> Charles River Laboratories, 8 Henshaw St., Woburn, MA 01801, USA

\* Corresponding author. Email: [taron@neb.com](mailto:taron@neb.com)

**This document provides information supplemental to the main text, in the following sections:**

**A - Supporting Experimental Section**

**B - Supporting Tables and Figures**

## **A - Supporting Experimental Section**

### *Gel Filtration*

Gel filtration for estimation of the molecular weight was performed using a HiPrep 16/60 Sephacryl S-200 HR column (GE Healthcare Life Sciences) equilibrated with 20 mM sodium phosphate, pH 7.4 containing 150 mM NaCl. Elution was carried out with the same buffer at a flow rate of 0.5 ml/min. The calibration proteins were used as follows: conalbumin (75 kDa), ovalbumin (43 kDa), carbonic anhydrase (29 kDa), ribonuclease A (13.7 kDa), and aprotinin (6.5 kDa).

### *Liquid chromatography mass spectrometry analysis (LC-MS)*

The lectin sample was diluted in 0.1% formic acid/water and analyzed by reverse phase liquid chromatography (LC) and electrospray ionization time-of-flight mass spectrometry (ESI-TOF MS). A custom reverse phase chip (Agilent Technologies), containing an integrated trapping column (40 nl capacity), separation column and nano-ESI emitter (75 mm x 150 mm both packed with PLRP-S, 5 mm particles, 1000 Å pore size) was used for the separation of proteins. The chip trapping column was loaded at 4 ml/min and the separation column developed at a flow rate of 600 nl/min using an Agilent 1200 series nano-LC coupled to an Agilent 6210 series ESI-TOF mass spectrometer. The column was equilibrated with 0.1% formic acid water containing 5% acetonitrile. 140 ng of protein was injected onto the column and it was developed after two minutes with a twenty-five minute linear gradient from 5% to 95% acetonitrile. Protein was found to elute at approximately twelve minutes post-injection. The mass spectra were acquired from 100-3200 m/z, one cycle/sec and 10,000 transients per scan using an ionization energy of 1800 V, fragmentor of 215 V, and drying gas of 275 °C at 4.0 l/min. The acquired spectra were extracted and the protein spectra deconvoluted with Agilent MassHunter Qualitative Analysis Software (with Bioconfirm) B 2.0.2 software using a mass range of 10k to 100k Daltons.

### *UPLC-HILIC-FLR and UPLC-HILIC-FLR-MS*

The 2-AB-labeled N-glycans were separated by UPLC using a Waters ACQUITY BEH Glycan Amide column (2.1 x 150 mm, 1.7 µm) that was installed on a Waters H-Class ACQUITY instrument equipped with a quaternary solvent manager and a fluorescence detector. Solvent A was 50 mM ammonium formate buffer pH 4.4 and solvent B was acetonitrile. The gradient used was 0-1.47 min, 30% solvent A; 1.47-24.81 min, 30-47% solvent A; 25.5-26.25 min, 70% solvent A; 26.55-32 min, 30% solvent A. The flow

rate was 0.561 mL/min. The injection volume was 10  $\mu$ L and the sample was prepared in 70% (v/v) acetonitrile. Samples were kept at 5°C prior to injection and the separation temperature was 40°C. The fluorescence detection wavelengths were  $\lambda_{ex}$  = 330 nm and  $\lambda_{em}$  = 420 nm with a data collection rate of 20 Hz. A dextran hydrolysate ladder was used to convert retention times into glucose unit (GU) values. All data was processed using Waters Empower 3 chromatography workstation software.

HPLC-HILIC-FLR-MS was performed using a Waters XBridge<sup>TM</sup> BEH Amide column (3  $\times$  150 mm, 2.5  $\mu$ m) on a Dionex UltiMate<sup>®</sup> LC, in line with a LTQ<sup>TM</sup> Velos<sup>TM</sup> Pro Mass Spectrometer equipped with a heated electrospray standard source (HESI-II probe). The flow rate was 0.300 mL/min and the column temperature was maintained at 30°C; solvent A was 50 mM ammonium formate buffer pH 4.4 and solvent B was acetonitrile. A linear gradient of 30% to 47% A over 50 min was used. The injection volume was 98  $\mu$ L and the sample was prepared in 80% (v/v) acetonitrile. MS data was acquired in positive ion mode with a source voltage of 3 kV and capillary temperature of 275°C. Sheath gas flow, Aux gas and sweep gas flow rates were 11, 5 and 0, respectively. Full scan data for rabbit and human N-glycans were acquired over a m/z range of 400 to 2000. All data was processed using Thermo<sup>TM</sup> Xcalibur Roadmap.

#### *BKF treatment*

Recombinant  $\alpha$ (1-2/4/6)-fucosidase (New England Biolabs) was used for the structural characterization of the glycans. 2AB-labeled N-glycans were incubated with 32 mU of  $\alpha$ (1-2/4/6)-fucosidase in 20  $\mu$ L of 50 mM sodium acetate buffer (pH 5.5) for 24-48 h at 37°C. After digestion, the enzymes were removed from the sample by filtration through a 10 kDa MWCO ultrafiltration plate (Pall LifeSciences). The filtrate was dried in a SpeedVac and re-suspended in H<sub>2</sub>O for analysis by UPLC-HILIC-FLR.

## B – Supporting Tables and Figures

**Table S1. Representation of structures of AMC-labeled oligosaccharides used for microtiter plate glycan binding screening.**

| Glycan | Structure*                                                                                                                                                                                                                                                       |
|--------|------------------------------------------------------------------------------------------------------------------------------------------------------------------------------------------------------------------------------------------------------------------|
| 1      | GlcNAc $\beta$ 1-2Man $\alpha$ 1-6(GlcNAc $\beta$ 1-4)(GlcNAc $\beta$ 1-2Man $\alpha$ 1-3)Man $\beta$ 1-4GlcNAc $\beta$ 1-4GlcNAc                                                                                                                                |
| 2      | Neu5Ac $\alpha$ 2-6GalNAc                                                                                                                                                                                                                                        |
| 3      | Gal $\beta$ 1-4GlcNAc                                                                                                                                                                                                                                            |
| 4      | GlcNAc $\beta$ 1-4GlcNAc $\beta$ 1-4GlcNAc $\beta$ 1-4GlcNAc                                                                                                                                                                                                     |
| 5      | GalNAc $\alpha$ 1-3(Fuc $\alpha$ 1-2)Gal                                                                                                                                                                                                                         |
| 6      | Fuc $\alpha$ 1-2Gal $\beta$ 1-4Glc                                                                                                                                                                                                                               |
| 7      | Gal $\beta$ 1-3(Neu5Ac $\alpha$ 2-6)GlcNAc $\beta$ 1-3Gal $\beta$ 1-4Glc                                                                                                                                                                                         |
| 8      | Fuc $\alpha$ 1-2Gal $\beta$ 1-3(Fuc $\alpha$ 1-4)GlcNAc $\beta$ 1-3Gal $\beta$ 1-4Glc                                                                                                                                                                            |
| 9      | Neu5Ac $\alpha$ 2-6Gal $\beta$ 1-4GlcNAc $\beta$ 1-3Gal $\beta$ 1-4Glc                                                                                                                                                                                           |
| 10     | Gal $\beta$ 1-3GalNAc $\beta$ 1-4(Neu5Ac $\alpha$ 2-3)Gal $\beta$ 1-4Glc                                                                                                                                                                                         |
| 11     | Neu5Ac $\alpha$ 2-8Neu5Ac $\alpha$ 2-8Neu5Ac $\alpha$ 2-8Neu5Ac                                                                                                                                                                                                  |
| 12     | Glc $\alpha$ 1-4Glc $\alpha$ 1-4Glc                                                                                                                                                                                                                              |
| 13     | Gal $\beta$ 1-3(Fuc $\alpha$ 1-4)GlcNAc $\beta$ 1-3Gal $\beta$ 1-4(Fuc $\alpha$ 1-3)GlcNAc $\beta$ 1-3Gal $\beta$ 1-4Glc                                                                                                                                         |
| 14     | Gal $\beta$ 1-4(Fuc $\alpha$ 1-3)GlcNAc $\beta$ 1-6(Fuc $\alpha$ 1-2Gal $\beta$ 1-3(Fuc $\alpha$ 1-3)GlcNAc $\beta$ 1-3)Gal $\beta$ 1-4Glc                                                                                                                       |
| 15     | Gal $\alpha$ 1-3Gal $\beta$ 1-4Gal $\alpha$ 1-3Gal                                                                                                                                                                                                               |
| 16     | Gal $\alpha$ 1-3Gal                                                                                                                                                                                                                                              |
| 17     | Man $\alpha$ 1-6(Man $\alpha$ 1-3)Man $\alpha$ 1-6(Man $\alpha$ 1-3)Man                                                                                                                                                                                          |
| 18     | GlcNAc $\beta$ 1-2Man $\alpha$ 1-6 (GlcNAc $\beta$ 1-2Man $\alpha$ 1-3)Man                                                                                                                                                                                       |
| 19     | Neu5Ac $\alpha$ 2-3Gal $\beta$ 1-3GlcNAc $\beta$ 1-3Gal $\beta$ 1-4Glc                                                                                                                                                                                           |
| 20     | Xyl                                                                                                                                                                                                                                                              |
| 21     | GlcA $\beta$ 1-3GlcNAc $\beta$ 1-4GlcA $\beta$ 1-3GlcNAc $\beta$ 1-4GlcA $\beta$ 1-3GlcNAc $\beta$ 1-4GlcA $\beta$ 1-3GlcNAc                                                                                                                                     |
| 22     | Xyl $\beta$ 1-4Xyl $\beta$ 1-4Xyl                                                                                                                                                                                                                                |
| 23     | Man $\beta$ 1-4Man $\beta$ 1-4Man                                                                                                                                                                                                                                |
| 24     | Xyl $\beta$ 1-4Xyl $\beta$ 1-4Xyl $\beta$ 1-4Xyl                                                                                                                                                                                                                 |
| 25     | Ara $\alpha$ 1-5Ara $\alpha$ 1-5Ara $\alpha$ 1-5Ara                                                                                                                                                                                                              |
| 26     | Gal $\beta$ 1-3(Fuc $\alpha$ 1-4)GlcNAc $\beta$ 1-3Glc                                                                                                                                                                                                           |
| 27     | Gal $\alpha$ 1-6Gal $\alpha$ 1-6Glc $\alpha$ 1-2Fru                                                                                                                                                                                                              |
| 28     | Man $\alpha$ 1-3Man $\beta$ 1-4GlcNAc                                                                                                                                                                                                                            |
| 29     | Neu5Ac $\alpha$ 2-3,6 Gal $\beta$ 1-4GlcNAc $\beta$ 1-2 Man $\alpha$ 1-3 (Neu5Ac $\alpha$ 2-3,6Gal $\beta$ 1-4GlcNAc $\beta$ 1-2 Man $\alpha$ 1-3)Man $\beta$ 1-4GlcNAc $\beta$ 1-4GlcNAc                                                                        |
| 30     | Man $\beta$ 1-4Man                                                                                                                                                                                                                                               |
| 31     | GalNAc                                                                                                                                                                                                                                                           |
| 32     | GalA                                                                                                                                                                                                                                                             |
| 33     | GlcA                                                                                                                                                                                                                                                             |
| 34     | Man $\alpha$ 1-6(Man $\alpha$ 1-3)Man $\beta$ 1-4GlcNAc $\beta$ 1-4(Fuc $\alpha$ 1-6)GlcNAc                                                                                                                                                                      |
| 35     | GlcNAc $\beta$ 1-4(Fuc $\alpha$ 1-6)GlcNAc                                                                                                                                                                                                                       |
| 36     | Gal $\beta$ 1-4GlcNAc $\beta$ 1-2Man $\alpha$ 1-6(GlcNAc $\beta$ 1-Man $\alpha$ 1-3)Man $\beta$ 1-4GlcNAc $\beta$ 1-4(Fuc $\alpha$ 1-6)GlcNAc                                                                                                                    |
| 37     | Gal $\alpha$ 1,4Gal $\beta$ 1-4Glc                                                                                                                                                                                                                               |
| 38     | Man $\alpha$ 1-3Man $\beta$ 1-4GlcNAc                                                                                                                                                                                                                            |
| 39     | Neu5Ac $\alpha$ 2-6Gal $\beta$ 1-4GlcNAc $\beta$ 1-2(Neu5Ac $\alpha$ 2-3Gal $\beta$ 1-3 (Neu5Ac $\alpha$ 2-6)GlcNAc $\beta$ 1-4)Man $\alpha$ 1-3(Neu5Ac $\alpha$ 2-3,6Gal $\beta$ 1-4GlcNAc $\beta$ 1-2 Man $\alpha$ 1-6)Man $\beta$ 1-4GlcNAc $\beta$ 1-4GlcNAc |
| 40     | Glc $\beta$ 1-4Glc $\beta$ 1-4Glc $\beta$ 1-4Glc                                                                                                                                                                                                                 |
| 41     | Neu5Ac $\alpha$ 2-3,6 Gal $\beta$ 1-3GalNAc                                                                                                                                                                                                                      |

|    |                                                                                                                                                                                                                  |
|----|------------------------------------------------------------------------------------------------------------------------------------------------------------------------------------------------------------------|
| 42 | GalNAc $\alpha$ 1-3(Fuc $\alpha$ 1-2)Gal $\beta$ 1-4Glc                                                                                                                                                          |
| 43 | Man $\alpha$ 1-6(Man $\alpha$ 1-3)Man $\alpha$ 1-6(Man $\alpha$ 1-3)Man $\beta$ 1-4GlcNAc                                                                                                                        |
| 44 | Gal $\beta$ 1-4Glc                                                                                                                                                                                               |
| 45 | Gal $\beta$ 1-4(Fuc $\alpha$ 1-3)GlcNAc $\beta$ 1-3Gal $\beta$ 1-4Glc                                                                                                                                            |
| 46 | Gal $\alpha$ 1-3(Fuc $\alpha$ 1-2)Gal $\beta$ 1-4(Fuc $\alpha$ 1-2)Glc                                                                                                                                           |
| 47 | Gal $\beta$ 1-4GlcNAc $\beta$ 1-6(Gal $\beta$ 1-4GlcNAc $\beta$ 1-2)Man $\alpha$ 1-6Gal $\beta$ 1-4GlcNAc $\beta$ 1-4(Gal $\beta$ 1-4GlcNAc $\beta$ 1-2)Man $\alpha$ 1-3)Man $\beta$ 1-4GlcNAc $\beta$ 1-4GlcNAc |
| 48 | GlcNAc $\beta$ 1-4GlcNAc $\beta$ 1-4GlcNAc                                                                                                                                                                       |
| 49 | Gal $\beta$ 1,4(Fuc $\alpha$ 1-3)GlcNAc $\beta$ 1-6(Gal $\beta$ 1-3(Fuc $\alpha$ 1-4)GlcNAc b1,3)Gal $\beta$ 1-4Glc                                                                                              |
| 50 | Gal $\beta$ 1-4(Fuc $\alpha$ 1-3)GlcNAc $\beta$ 1-6(Fuc $\alpha$ 1-2Gal $\beta$ 1-3(Fuc $\alpha$ 1-4)GlcNAc $\beta$ 1-3)Gal $\beta$ 1-4Glc                                                                       |
| 51 | Gal $\beta$ 1-4(Fuc $\alpha$ 1-3)GlcNAc $\beta$ 1-3Gal $\beta$ 1-4-Glc                                                                                                                                           |
| 52 | GalNAc $\alpha$ 1-3(Fuc $\alpha$ 1-2)Gal $\beta$ 1-4Glc                                                                                                                                                          |
| 53 | Man $\alpha$ 1-6Man $\alpha$ 1-6Man                                                                                                                                                                              |
| 54 | Man $\alpha$ 1-6(Man $\alpha$ 1-3)Man $\beta$ 1-4GlcNAc $\beta$ 1-4GlcNAc                                                                                                                                        |
| 55 | Man $\alpha$ 1-6(Man $\alpha$ 1-3)Man $\alpha$ 1-6(Man $\alpha$ 1-3)Man $\beta$ 1-4GlcNAc $\beta$ 1-4GlcNAc                                                                                                      |
| 56 | Fuc $\alpha$ 1-6GlcNAc                                                                                                                                                                                           |

\* GlcNAc, N-Acetyl-D-glucosamine; Man, D-Mannose; Neu5Ac, N-Acetylneuraminic acid; GalNAc, N-Acetyl-D-galactosamine; Gal, D-Galactose; Fuc, D-Fucose; Glc, D-Glucose; Xyl, D-Xylose; Ara, D-Arabinose; GalA, D-Galactouronic acid; GlcA, D-Glucuronic acid

**Table S2. Mammalian glycan array (CFG) data for SL2-1.** Only results of the core-fucosylated N-glycans are presented in the table. The data is arranged by RFU (high to low) to provide a list of the glycans bound with highest intensity. The rank number corresponds to the overall rank # in the complete list of 609 glycans. RFU values for available analogous of non-core-fucosylated glycans are also provided.

| Rank | Glycan Structure (text)*                                                                                                                                                                                                                                                                               | Glycan Structure (symbol)** | RFU   | St Dev | % CV | Non-CF analog (RFU) |
|------|--------------------------------------------------------------------------------------------------------------------------------------------------------------------------------------------------------------------------------------------------------------------------------------------------------|-----------------------------|-------|--------|------|---------------------|
| 1    | Galb1-4GlcNAcb1-3Galb1-4GlcNAcb1-3Galb1-4GlcNAcb1-3Galb1-4GlcNAcb1-3Galb1-4GlcNAcb1-6(Galb1-4GlcNAcb1-3Galb1-4GlcNAcb1-3Galb1-4GlcNAcb1-3Galb1-4GlcNAcb1-2)Mana1-6(Galb1-4GlcNAcb1-3Galb1-4GlcNAcb1-3Galb1-4GlcNAcb1-3Galb1-4GlcNAcb1-3Galb1-4GlcNAcb1-2Mana1-3)Manb1-4GlcNAcb1-4(Fuca1-6)GlcNAcb-Sp24 |                             | 17143 | 215    | 1    | n/a                 |
| 2    | GlcNAcb1-3Galb1-4GlcNAcb1-3Galb1-4GlcNAcb1-3Galb1-4GlcNAcb1-2Mana1-6(GlcNAcb1-3Galb1-4GlcNAcb1-3Galb1-4GlcNAcb1-3Galb1-4GlcNAcb1-2Mana1-3)Manb1-4GlcNAcb1-4(Fuca1-6)GlcNAcb-Sp24                                                                                                                       |                             | 15311 | 352    | 2    | 431                 |
| 3    | GlcNAcb1-3Galb1-4GlcNAcb1-3Galb1-4GlcNAcb1-3Galb1-4GlcNAcb1-3Galb1-4GlcNAcb1-6(GlcNAcb1-3Galb1-4GlcNAcb1-3Galb1-4GlcNAcb1-3Galb1-4GlcNAcb1-3Galb1-4GlcNAcb1-3Galb1-4GlcNAcb1-3Galb1-4GlcNAcb1-3Galb1-4GlcNAcb1-3Galb1-4GlcNAcb1-2Mana1-3)Manb1-4GlcNAcb1-4(Fuca1-6)GlcNAcb-Sp24                        |                             | 14766 | 777    | 5    | n/a                 |
| 4    | Galb1-4GlcNAcb1-3Galb1-4GlcNAcb1-3Galb1-4GlcNAcb1-3Galb1-4GlcNAcb1-2Mana1-6(Galb1-4GlcNAcb1-3Galb1-4GlcNAcb1-3Galb1-4GlcNAcb1-3Galb1-4GlcNAcb1-2Mana1-3)Manb1-4GlcNAcb1-4(Fuca1-6)GlcNAcb-Sp24                                                                                                         |                             | 14336 | 1075   | 8    | 622                 |
| 5    | Galb1-4GlcNAcb1-6(Galb1-4GlcNAcb1-2)Mana1-6(Galb1-4GlcNAcb1-2Mana1-3)Manb1-4GlcNAcb1-4(Fuca1-6)GlcNAcb-Sp24                                                                                                                                                                                            |                             | 13565 | 844    | 6    | 399                 |
| 6    | Galb1-4GlcNAcb1-3Galb1-4GlcNAcb1-3Galb1-4GlcNAcb1-3Galb1-4GlcNAcb1-6(Galb1-4GlcNAcb1-3Galb1-4GlcNAcb1-3Galb1-4GlcNAcb1-3Galb1-4GlcNAcb1-3Galb1-4GlcNAcb1-2)Mana1-6(Galb1-4GlcNAcb1-3Galb1-4GlcNAcb1-3Galb1-4GlcNAcb1-3Galb1-4GlcNAcb1-2Mana1-3)Manb1-4GlcNAcb1-4(Fuca1-6)GlcNAcb-Sp24                  |                             | 13209 | 987    | 7    | n/a                 |
| 7    | GlcNAcb1-3Galb1-4GlcNAcb1-3Galb1-4GlcNAcb1-3Galb1-4GlcNAcb1-3Galb1-4GlcNAcb1-2Mana1-6(GlcNAcb1-3Galb1-4GlcNAcb1-3Galb1-4GlcNAcb1-3Galb1-4GlcNAcb1-3Galb1-4GlcNAcb1-2Mana1-3)Manb1-4GlcNAcb1-4(Fuca1-6)GlcNAcb-Sp19                                                                                     |                             | 12875 | 1156   | 9    | 399                 |
| 8    | Fuca1-2Galb1-4(Fuca1-3)GlcNAcb1-2Mana1-6(Fuca1-2Galb1-4(Fuca1-3)GlcNAcb1-2Mana1-3)Manb1-4GlcNAcb1-4(Fuca1-6)GlcNAcb-Sp24                                                                                                                                                                               |                             | 11738 | 1064   | 9    | 187                 |
| 9    | Neu5Aca2-6Galb1-4GlcNAcb1-2Mana1-6(Neu5Aca2-6Galb1-4GlcNAcb1-2Mana1-3)Manb1-4GlcNAcb1-4(Fuca1-6)GlcNAcb-Sp24                                                                                                                                                                                           |                             | 10358 | 779    | 8    | 51                  |

|    |                                                                                                                                                                                                                                  |                                                                                      |       |      |    |     |
|----|----------------------------------------------------------------------------------------------------------------------------------------------------------------------------------------------------------------------------------|--------------------------------------------------------------------------------------|-------|------|----|-----|
| 10 | Galb1-3GlcNAcb1-3Galb1-4GlcNAcb1-3Galb1-4GlcNAcb1-6(Galb1-3GlcNAcb1-3Galb1-4GlcNAcb1-3Galb1-4GlcNAcb1-2)Mana1-6(Galb1-3GlcNAcb1-3Galb1-4GlcNAcb1-3Galb1-4GlcNAcb1-2Mana1-3)Manb1-4GlcNAcb1-4(Fuca1-6)GlcNAcb-Sp24                | 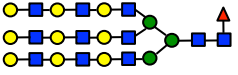   | 10241 | 166  | 2  | n/a |
| 11 | GlcNAcb1-6(GlcNAcb1-2)Mana1-6(GlcNAcb1-2Mana1-3)Manb1-4GlcNAcb1-4(Fuca1-6)GlcNAcb-Sp24                                                                                                                                           |     | 9832  | 538  | 2  | 52  |
| 12 | Galb1-4GlcNAcb1-3Galb1-4GlcNAcb1-3Galb1-4GlcNAcb1-3Galb1-4GlcNAcb1-3Galb1-4GlcNAcb1-2Mana1-6(Galb1-4GlcNAcb1-3Galb1-4GlcNAcb1-3Galb1-4GlcNAcb1-3Galb1-4GlcNAcb1-3Galb1-4GlcNAcb1-2Mana1-3)Manb1-4GlcNAcb1-4(Fuca1-6)GlcNAcb-Sp19 |    | 9711  | 1226 | 13 | 630 |
| 13 | Galb1-4GlcNAcb1-3Galb1-4GlcNAcb1-2Mana1-6(Galb1-4GlcNAcb1-3Galb1-4GlcNAcb1-2Mana1-3)Manb1-4GlcNAcb1-4(Fuca1-6)GlcNAcb-Sp24                                                                                                       |     | 8211  | 1573 | 19 | 288 |
| 14 | Galb1-4GlcNAcb1-3Galb1-4GlcNAcb1-3Galb1-4GlcNAcb1-6(Galb1-4GlcNAcb1-3Galb1-4GlcNAcb1-3Galb1-4GlcNAcb1-2)Mana1-6(Galb1-4GlcNAcb1-3Galb1-4GlcNAcb1-3Galb1-4GlcNAcb1-2Mana1-3)Manb1-4GlcNAcb1-4(Fuca1-6)GlcNAcb-Sp24                |    | 7999  | 1503 | 19 | n/a |
| 15 | GlcNAcb1-3Galb1-4GlcNAcb1-3Galb1-4GlcNAcb1-2Mana1-6(GlcNAcb1-3Galb1-4GlcNAcb1-3Galb1-4GlcNAcb1-2Mana1-3)Manb1-4GlcNAcb1-4(Fuca1-6)GlcNAcb-Sp24                                                                                   |    | 7646  | 527  | 7  | 145 |
| 16 | GlcNAcb1-3Galb1-4GlcNAcb1-3Galb1-4GlcNAcb1-6(GlcNAcb1-3Galb1-4GlcNAcb1-3Galb1-4GlcNAcb1-2)Mana1-6(GlcNAcb1-3Galb1-4GlcNAcb1-3Galb1-4GlcNAcb1-2Mana1-3)Manb1-4GlcNAcb1-4(Fuca1-6)GlcNAcb-Sp24                                     |  | 7045  | 797  | 11 | n/a |
| 17 | Galb1-4GlcNAcb1-3Galb1-4GlcNAcb1-6(Galb1-4GlcNAcb1-3Galb1-4GlcNAcb1-2)Mana1-6(Galb1-4GlcNAcb1-3Galb1-4GlcNAcb1-2Mana1-3)Manb1-4GlcNAcb1-4(Fuca1-6)GlcNAcb-Sp24                                                                   |  | 6845  | 430  | 6  | 779 |
| 18 | GlcNAcb1-3Galb1-4GlcNAcb1-3Galb1-4GlcNAcb1-3Galb1-4GlcNAcb1-6(GlcNAcb1-3Galb1-4GlcNAcb1-3Galb1-4GlcNAcb1-2)Mana1-6(GlcNAcb1-3Galb1-4GlcNAcb1-3Galb1-4GlcNAcb1-3Galb1-4GlcNAcb1-2Mana1-3)Manb1-4GlcNAcb1-4(Fuca1-6)GlcNAcb-Sp24   |  | 6100  | 815  | 13 | n/a |
| 19 | Galb1-4GlcNAcb1-3Galb1-4GlcNAcb1-3Galb1-4GlcNAcb1-2Mana1-6(Galb1-4GlcNAcb1-3Galb1-4GlcNAcb1-3Galb1-4GlcNAcb1-2Mana1-3)Manb1-4GlcNAcb1-4(Fuca1-6)GlcNAcb-Sp24                                                                     |  | 5959  | 970  | 16 | 21  |
| 20 | Galb1-4GlcNAcb1-6(Galb1-4GlcNAcb1-2)Mana1-6(GlcNAcb1-4)Galb1-4GlcNAcb1-4(Galb1-4GlcNAcb1-2)Mana1-3)Manb1-4GlcNAcb1-4(Fuca1-6)GlcNAcb-Sp21                                                                                        |   | 5929  | 1156 | 19 | 18  |
| 21 | GlcNAcb1-3Galb1-4GlcNAcb1-2Mana1-6(GlcNAcb1-3Galb1-4GlcNAcb1-2Mana1-3)Manb1-4GlcNAcb1-4(Fuca1-6)GlcNAcb-Sp24                                                                                                                     |   | 5659  | 352  | 6  | 417 |

|    |                                                                                                                               |  |      |     |    |     |
|----|-------------------------------------------------------------------------------------------------------------------------------|--|------|-----|----|-----|
| 22 | GlcNAcb1-2 Mana1-6(GlcNAcb1-4)(GlcNAcb1-2Mana1-3)Manb1-4GlcNAcb1-4(Fuca1-6)GlcNAc-Sp21                                        |  | 5610 | 377 | 7  | 14  |
| 23 | Galb1-4GlcNAcb1-2 Mana1-6(Galb1-4GlcNAcb1-4)(Galb1-4GlcNAcb1-2Mana1-3)Manb1-4GlcNAcb1-4(Fuca1-6)GlcNAc-Sp21                   |  | 5093 | 636 | 12 | n/a |
| 24 | Neu5Aca2-3Galb1-4GlcNAcb1-2Mana1-6(Neu5Aca2-3Galb1-4GlcNAcb1-2Mana1-3)Manb1-4GlcNAcb1-4(Fuca1-6)GlcNAc-Sp24                   |  | 4566 | 74  | 2  | 20  |
| 25 | Fuca1-2Galb1-4GlcNAcb1-2Mana1-6(Fuca1-2Galb1-4GlcNAcb1-2Mana1-3)Manb1/9-4GlcNAcb1-4(Fuca1-6)GlcNAc-Sp22                       |  | 4339 | 533 | 12 | 570 |
| 26 | GlcNAcb1-6(GlcNAcb1-2)Mana1-6(GlcNAcb1-4)(GlcNAcb1-4)(GlcNAcb1-2)Mana1-3)Manb1-4GlcNAcb1-4(Fuca1-6)GlcNAc-Sp21                |  | 4091 | 236 | 6  | 14  |
| 27 | Gala1-3(Fuca1-2)Galb1-4GlcNAcb1-2Mana1-6(Gala1-3(Fuca1-2)Galb1-4GlcNAcb1-2Mana1-3)Manb1-4GlcNAcb1-4(Fuca1-6)GlcNAc-Sp22       |  | 3649 | 529 | 15 | 564 |
| 28 | Mana1-6(Mana1-3)Manb1-4GlcNAcb1-4(Fuca1-6)GlcNAc-Sp19                                                                         |  | 3630 | 244 | 7  | 25  |
| 29 | Fuca1-2Galb1-3(Fuca1-4)GlcNAcb1-2Mana1-6(Fuca1-2Galb1-3(Fuca1-4)GlcNAcb1-2Mana1-3)Manb1-4GlcNAcb1-4(Fuca1-6)GlcNAc-Sp19       |  | 3222 | 144 | 4  | 120 |
| 30 | Galb1-4GlcNAcb1-2Mana1-6(Galb1-4GlcNAcb1-2Mana1-3)Manb1-4GlcNAcb1-4(Fuca1-6)GlcNAc-Sp22                                       |  | 3222 | 524 | 16 | 19  |
| 31 | Galb1-4GlcNAcb1-2 Mana1-6(GlcNAcb1-4)(Galb1-4GlcNAcb1-2Mana1-3)Manb1-4GlcNAcb1-4(Fuca1-6)GlcNAc-Sp21                          |  | 3216 | 143 | 4  | 29  |
| 32 | GalNAca1-3(Fuca1-2)Galb1-3GlcNAcb1-2Mana1-6(GalNAca1-3(Fuca1-2)Galb1-3GlcNAcb1-2Mana1-3)Manb1-4GlcNAcb1-4(Fuca1-6)GlcNAc-Sp22 |  | 2820 | 454 | 16 | 418 |
| 33 | Fuca1-2Galb1-3GlcNAcb1-2Mana1-6(Fuca1-2Galb1-3GlcNAcb1-2Mana1-3)Manb1-4GlcNAcb1-4(Fuca1-6)GlcNAc-Sp22                         |  | 2614 | 126 | 5  | 421 |
| 34 | Galb1-3GlcNAcb1-2Mana1-6(Galb1-3GlcNAcb1-2Mana1-3)Manb1-4GlcNAcb1-4(Fuca1-6)GlcNAc-Sp22                                       |  | 2390 | 426 | 18 | 130 |
| 35 | Gala1-3(Fuca1-2)Galb1-3GlcNAcb1-2Mana1-6(Gala1-3(Fuca1-2)Galb1-3GlcNAcb1-2Mana1-3)Manb1-4GlcNAcb1-4(Fuca1-6)GlcNAc-Sp22       |  | 2381 | 293 | 12 | n/a |
| 36 | GlcNAcb1-2Mana1-6(GlcNAcb1-2Mana1-3)Manb1-4GlcNAcb1-4(Fuca1-6)GlcNAc-Sp22                                                     |  | 1708 | 194 | 11 | 26  |
| 37 | GalNAca1-3(Fuca1-2)Galb1-4GlcNAcb1-2Mana1-6(GalNAca1-3(Fuca1-2)Galb1-4GlcNAcb1-2Mana1-3)Manb1-4GlcNAcb1-4(Fuca1-6)GlcNAc-Sp22 |  | 1558 | 87  | 6  | 511 |



|     |                                                                                                                                                                |  |      |    |    |     |
|-----|----------------------------------------------------------------------------------------------------------------------------------------------------------------|--|------|----|----|-----|
| 41  | Galb1-4(Fuca1-3)GlcNAcb1-2Mana1-6(Galb1-4(Fuca1-3)GlcNAcb1-2Mana1-3)Manb1-4GlcNAcb1-4(Fuca1-6)GlcNAcb-Sp22                                                     |  | 1069 | 24 | 2  | 287 |
| 46  | Galb1-3GlcNAcb1-3Galb1-4GlcNAcb1-6(Galb1-3GlcNAcb1-3Galb1-4GlcNAcb1-2)Mana1-6(Galb1-3GlcNAcb1-3Galb1-4GlcNAcb1-2Mana1-3)Manb1-4GlcNAcb1-4(Fuca1-6)GlcNAcb-Sp24 |  | 743  | 77 | 10 | n/a |
| 120 | Fuca1-4(Galb1-3)GlcNAcb1-2Mana1-6(Fuca1-4(Galb1-3)GlcNAcb1-2Mana1-3)Manb1-4GlcNAcb1-4(Fuca1-6)GlcNAcb-Sp22                                                     |  | 94   | 7  | 7  | n/a |

\* GlcNAc, N-Acetyl-D-glucosamine; Man, D-Mannose; Neu5Ac, N-Acetylneuraminic acid; GalNAc, N-Acetyl-D-galactosamine; Gal, D-Galactose; Fuc, D-Fucose

\*\* GlcNAc: blue square; Man, green circle; Neu5Ac: purple diamond; GalNAc: yellow square; Gal: yellow circle; Fuc: red triangle

**Table S3. rIgG core-fucosylated N-glycans: enrichment efficiency.** UPLC-HILIC-FLR profiles of unbound (FT) and lectin-bound (EL) fractions (including profiles of BKF-treated fractions) were integrated using Empower 3 software, and the enrichment efficiency was calculated using the obtained relative areas of each core-fucosylated glycan peak in FT (+ lectin), EL (+ lectin) and FT (no lectin) fractions.

| Retention time (min) | GU    | N-glycan composition                                               | Capture efficiency (% of total) |
|----------------------|-------|--------------------------------------------------------------------|---------------------------------|
| 4.64                 | 5.82  | HexNAc(4)Hex(3)dHex(1)                                             | 91                              |
| 5.26                 | 6.19  | HexNAc(5)Hex(3)dHex(1)                                             | 93.1                            |
| 6.03                 | 6.6   | HexNAc(4)Hex(4)dHex(1)                                             | 91.7                            |
| 6.25                 | 6.73  | HexNAc(4)Hex(4)dHex(1)                                             | 92.5                            |
| 6.51                 | 6.87  | HexNAc(5)Hex(4)dHex(1)                                             | 93.4                            |
| 6.78                 | 6.99  | HexNAc(5)Hex(4)dHex(1)                                             | 94                              |
| 7.76                 | 7.51  | HexNAc(4)Hex(5)dHex(1)                                             | 97.9                            |
| 8.07                 | 7.68  | HexNAc(5)Hex(5)dHex(1)                                             | 96.6                            |
| 9.42                 | 8.38  | HexNAc(4)Hex(4)Neu5Gc(1)dHex(1)<br>HexNAc(5)Hex(4)Neu5Gc(1)dHex(1) | 91                              |
| 10.9                 | 9.17  | HexNAc(4)Hex(5)Neu5Gc(1)dHex(1)                                    | 91.2                            |
| 11.42                | 9.42  | HexNAc(5)Hex(5)dHex(1)Neu5Gc(1)                                    | 94.6                            |
| 14.04                | 10.8  | HexNAc(4)Hex(5)dHex(1)Neu5Gc(2)                                    | 97.8                            |
| 14.29                | 10.97 | HexNAc(5)Hex(5)dHex(1)Neu5Gc(2)                                    | 91.5                            |

**Table S4. hIgG core-fucosylated N-glycans: enrichment efficiency.** UPLC-HILIC-FLR profiles of unbound (FT) and lectin-bound (EL) fractions (including profiles of BKF-treated fractions) were integrated using Empower 3 software, and the enrichment efficiency was calculated using the obtained relative areas of each core-fucosylated glycan peak in FT (+ lectin), EL (+ lectin) and FT (no lectin) fractions.

| Retention time (min) | GU    | N-glycan composition                                               | Capture efficiency (% of total) |
|----------------------|-------|--------------------------------------------------------------------|---------------------------------|
| 4.64                 | 5.85  | HexNAc(4)Hex(3)dHex(1)                                             | 87                              |
| 5.26                 | 6.21  | HexNAc(5)Hex(3)dHex(1)                                             | 96.8                            |
| 6.03                 | 6.64  | HexNAc(4)Hex(4)dHex(1)                                             | 89.3                            |
| 6.25                 | 6.76  | HexNAc(4)Hex(4)dHex(1)                                             | 88.5                            |
| 6.51                 | 6.89  | HexNAc(5)Hex(4)dHex(1)                                             | 87.2                            |
| 6.78                 | 7.01  | HexNAc(5)Hex(4)dHex(1)                                             | 87                              |
| 7.76                 | 7.54  | HexNAc(4)Hex(5)dHex(1)<br>HexNAc(3)Hex(4)Neu5Ac(1)dHex(1)          | 91.1                            |
| 8.07                 | 7.71  | HexNAc(5)Hex(5)dHex(1)                                             | 87                              |
| 8.56                 | 7.96  | HexNAc(4)Hex(4)Neu5Ac(1)dHex(1)<br>HexNAc(5)Hex(4)Neu5Ac(1)dHex(1) | 89.4                            |
| 9.22                 | 8.32  | HexNAc(5)Hex(4)Neu5Ac(1)dHex(1)                                    | 96.7                            |
| 10.07                | 8.75  | HexNAc(4)Hex(5)dHex(1)Neu5Ac(1)                                    | 92.7                            |
| 10.55                | 9.01  | HexNAc(5)Hex(5)dHex(1)Neu5Ac(1)                                    | 93.8                            |
| 12.37                | 9.93  | HexNAc(4)Hex(5)dHex(1)Neu5Ac(2)                                    | 96.9                            |
| 12.65                | 10.07 | HexNAc(5)Hex(5)dHex(1)Neu5Ac(2)                                    | 94.5                            |

```

AGP58216      1  -----MLTGTFLGLGALALAATAVAPAANA-----APVPVTSLNCDGDTYCTAGLRFGDGRWVAQWNVNVFHQSPA-- 67
WP_037947329 1  MS-aRRMLTGTFLGLGALALAATAVAPAANA-----APVPVTGLNCDGDTYKCTANLRFGDGRWVAQWNVNVFHQSA-- 72
WP_059148527 1  MS-aRRMLTGTFLGLGALALAATAVAPAANA-----APVPVTALNCDGDTYKCTANLAFGDGRWVAQWNVNVFHQSA-- 72
WP_030825832 1  MS-aRRMLTGTFLGLGALALAATAVAPAANA-----APVPVTALTCDGDTYKCTANLAFGDGRWVAQWNVNVFHQSA-- 72
WP_062012936 1  MS-aRRMLTGTFLGLGALALAATAVAPAANA-----APVPVTALTCDDGDTYKCTANLAFGDGRWVAQWNVNVFHQSA-- 72
WP_055550715 1  MS-aRRMLTGTFLGLGALLMVSTAVAPAATA-----APVPVTLNCDGDTYCTAGLRFGDGRWVADWNVNVFHQSAAs 74
WP_018088730 1  M---RRTIVGTCAALGALAIIGLAG---PATA-----APVPVTALNCDGDTYQCTANLRFGDNNWKAWSGANIFHQTPR-- 67
KJA18763     1  MQ-----LNTSFLSLLAAQAIVAVPFGSSHvtntLAPVPVTKLVCDGNSFKCTASLDFDGGNVAQWGTAVFHTGLFg- 74
WP_042158013 1  M---RRTIVGTCAALGALAIIGLAG---PATA-----APVPVTALNCDGDTYQCTANLRFGDNNWKAWSGANIFHQTPR-- 67
WP_030083396 1  M---RRTIVGTCAAFALGIGLAG---PAVA-----APVPVTALNCDGDTYKCTANLRFGDNNWKAWSGANIFHQAR-- 67
WP_030983681 1  M---RRTIVGTCAAFVAVGIGLAG---PAVA-----APVPVTALNCDGDTYKCTANLRFGDNNWRAGWGANIFHQVTR-- 67
WP_033267611 1  M---RRTIAGICAAALGALGIGGAA---PASA-----APVPVTALHCDGDTFTCTASLRFGDNNWKAWSANVYHQAVR-- 67
WP_051772026 1  MT-fKKALIALVVMASAPVFAVSVAEPTPrd----PVPVTGLWCDGDTYKCTAALDFDGGWVADWSADVYH-EDRa- 72
BAL02930     1  MN-----FTASFLALLAAQAISIAFPFGTgaktalAPVPVTKLTCDGASFMCTANLDFDGGNVAQWTSFVHRGNFg- 74
WP_006601771 1  M---RRTIVGTCAALAVLIGSAA---PAVA-----APVPVTALNCDGDTYKCTANLRFGDNNWKAWSGANIFHQANR-- 67
WP_054290187 1  -----MSCDGDTYRCTAALDFDGGWVADWSANVYH-A-Rv- 34
WP_015801300 1  MNitTKRIAAATSLAAASLLAAVV---PASAd-----PVDASGLTCDGQTYECVANLDFDGGNWTASWGACVMHVDLla- 71

```

---

```

AGP58216     68  sqqraarsadapRGAAPVPVTLTCDGDTYKCTAGLQFGDGRWVAQWNVNVFHQAMANAVPTasaktvkaprEAAAPVP 147
WP_037947329 73  shqrvtrrsadapRGAAPVPVTLTCDGDTYKCTAGLQFGDGRWVAQWNVNVFHQAVASAVPatsakavkaprEAAAPVP 152
WP_059148527 73  shqratrsadalRGAAPVPVTLTCDGDTYKCTAGLQFGDGRWVAQWNVNVFHQAVTNAVPAasaktvkaprEAAAPVP 152
WP_030825832 73  shqratgsadalRGAAPVPVTLTCDGDTYKCTAGLRFGDGRWVAQWNVNVFHQAMAHAESAasaktvkaprEAAAPVP 152
WP_062012936 73  srqratgsadalRGAAPVPVTLTCDGDTYKCTAGLRFGDGRWVAQWNVNVFHQAMAHAESAsaktvkaprEAAAPVP 152
WP_055550715 75  asaqsaeasqsaESVRAPVPVTLNCDGDTYKCTAGLRFGDGRWVAQWDARVPHQA-----gaqamkaprGEAAPVP 146
WP_018088730 68  -----SAYRAPVPVTLNCDGDTGKCIANLQFGDGYWRASWSANIFHQAFRSADGA-----RLAAPVP 125
KJA18763     75  ---aphdkefmhEMTLAPVPVTKLVCDGDTFQCTANLDFDGRWVAQWSTSVFHNLSRSETTH-----L-APVP 139
WP_042158013 68  -----SASRAPVPVTLNCDGDTGKCIANLQFGDGYWRASWSATIFHQGLRSADGT-----RLAAPVP 125
WP_030083396 68  -----SAYRAPVPVTLNCDGDTGKCIANLQFGDGYWRASWPATIFHQALRSADGA-----RLAAPVP 125
WP_030983681 68  -----SAYRAPVPATSLSCDGTGKCIANLQFGDGYWRASWPATIFHQALRSADGA-----RLAAPVP 125
WP_033267611 68  -----SAYRAPVPATSLSCDGTGQCVAGLQFGDGRWRASWPANVPHQALRSADGA-----RLAAPVP 125
WP_051772026 73  -----QQRDMVPVTRLRCDGDTYCTANLRFGDGRWVAWSVVDVYRTG--RAVQL-----DPVE 124
BAL02930     75  ---aphdkiiEQMAMAPVPVTELTCDGSFCLTANLDFDGGNVAQWNPANVPHSGFHPGGRK-----LFAPVP 140
WP_006601771 68  -----SASRAPVPATSLNCDGNGTCVADLMFGDGRWRASWPATVPHALRSADGT-----RLVAPVP 124
WP_054290187 35  -----EPRAMVPVTRLRCDGDTYKCTANLKFGDGRWVADWSVRVHHTN--RAEPR-----SPVR 86
WP_015801300 72  -----QQRSPVGTVKTCDGDTWTCTANLDFDGGGWTAEWGAWIAHEDKDEDARE-----APVD 125

```

---

```

AGP58216     148  VTALNCDGDTYKCTAGLQFGDGRWVAQWDASVPHQS----- 183
WP_037947329 153  VTALNCDGDTYKCTANLQFGDGRWVAQWDASVPHQN----- 188
WP_059148527 153  VTALNCDGDTYKCTANLQFGDGRWVAQWDASVPHQN----- 188
WP_030825832 153  VTALNCDGDTYKCTAGLQFGDGRWVAQWDASVPHQN----- 188
WP_062012936 153  VTALNCDGDTYKCTANLQFGDGRWVAQWDASVPHQN----- 188
WP_055550715 147  VTALNCDGDTGLCTANLQFGDGRWAAQWGANIFHQ----- 181
WP_018088730 126  ANSLNCDGNIGRCSVNLQFGDGNWKANWPAITYHL----- 160
KJA18763     140  VTKLVCDGDSFKCTGSLDFGDGKVAQWSTSVPHQSaffleqk 182
WP_042158013 126  ANSLNCDGNIGRCSVNLQFGDGNWKANWPAITYHL----- 160
WP_030083396 126  ANSLNCDGDTGRCSVNLQFGDGNWKAADWPAITYHQ----- 160
WP_030983681 126  ANSLNCDGDTGRCSVNLQFGDGNWKAADWPAITYHQ----- 160
WP_033267611 126  ANSLNCDGDTGRCSVNLQYGDGNWKAADWPAITYHQ----- 161
WP_051772026 125  VTGLWCDGDTYKCAALDFDGGWVADWSADIPHT----- 159
BAL02930     141  VTDLNCDEGTFMCTGNLDFADGNWKAQWNTNVFHNnffkqn- 182
WP_006601771 125  ANSLNCDGDTGRCSVNLQFGDGGWKAADWPAITYHQ----- 160
WP_054290187 87  VTGLWCDGDTYKCAALDFDGGRWVADWNVKVVYHS----- 121
WP_015801300 126  VVELTCDGDEGKCAKLDGDCRWAAEWSARIKHS----- 160

```

**Figure S1. Multiple sequence alignment of the hypothetical proteins identified through similarity search.** Aligned protein sequences are from *Streptomyces rapamycinicus* NRRL 5491 (AGP58216); *Streptomyces* sp. PRh5 (WP\_037947329); *Streptomyces violaceusniger* (WP\_059148527); *Streptomyces hygroscopicus* (WP\_030825832); *Streptomyces sporocinereus* (WP\_062012936); *Streptomyces* sp. NBRC 110028 (WP\_055550715); *Streptomyces* sp. FxanaC1 (WP\_018088730); *Hypholoma sublateritium* FD-334 SS-4 (KJA18763); *Streptomyces* sp. NBRC 110027 (WP\_042158013); *Streptomyces decoyicus* (WP\_030083396); *Streptomyces* sp. NRRL S-1813 (WP\_030983681); *Streptomyces lydicus* (WP\_033267611); *Saccharothrix* sp. NRRL B-16314 (WP\_051772026); *Pholiota nameko* (BAL02930); *Streptomyces auratus* (WP\_006601771); *Kibdelosporangium phytohabitans* (WP\_054290187) and *Actinosynnema mirum* (WP\_015801300).

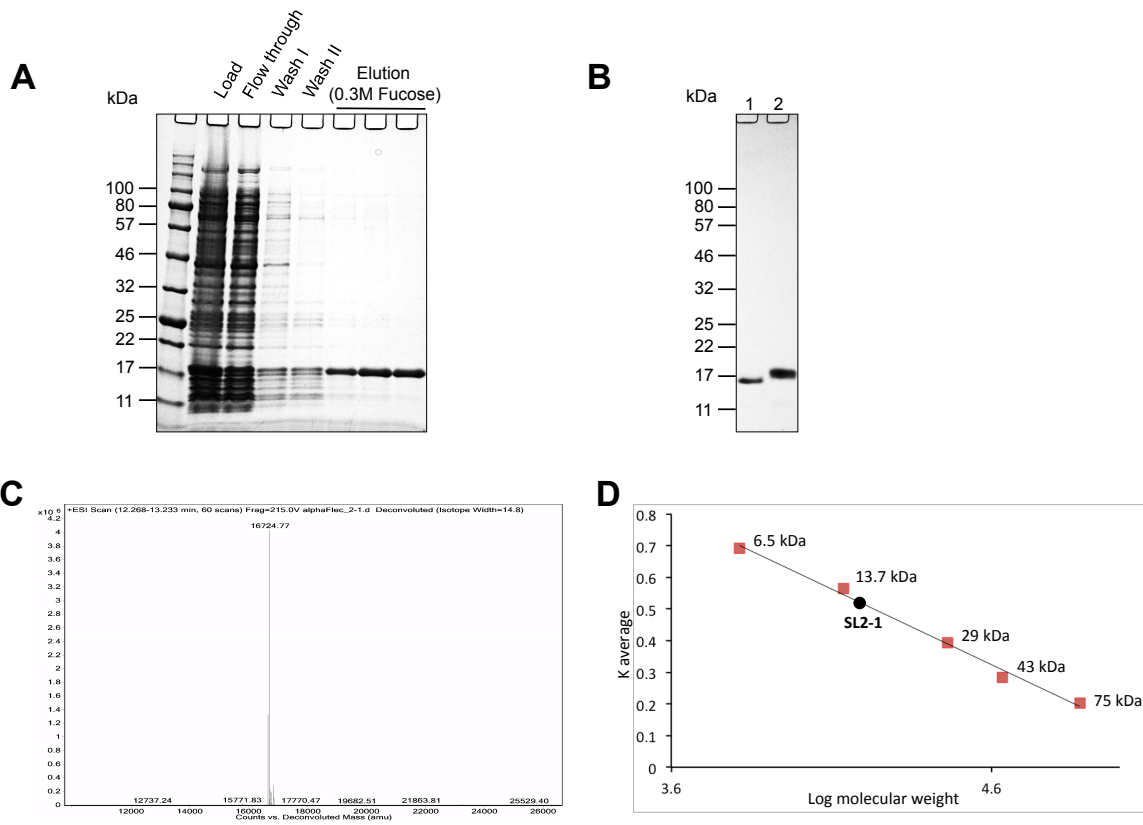

**Figure S2. Expression, purification and characterization of recombinant SL2-1.** (A) Recombinant protein was expressed in *E. coli* and purified by affinity chromatography using  $\alpha$ -L-fucose agarose resin. (B) Non-reduced (lane 1) and reduced (lane 2) purified protein detected as single band of ~17 kDa on the denaturing polyacrylamide gel. (C) Electrospray ionization mass spectrometry of recombinant SL2-1. (D) The apparent molecular mass of the native SL2-1 was estimated by gel filtration on a HiPrep 16/60 Sephacryl S-200 HR column.

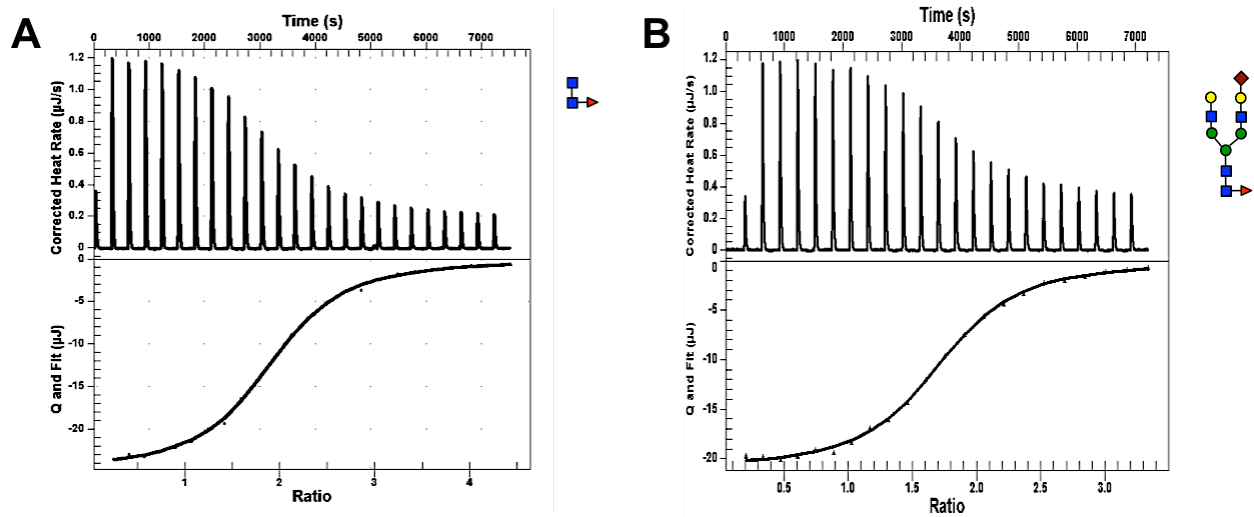

Figure S3. Typical ITC titration curves obtained for  $\alpha$ 1-6 fucosylated chitobiose (N2F) and a monosialo-fucosylated biantennary N-glycan (A1F).

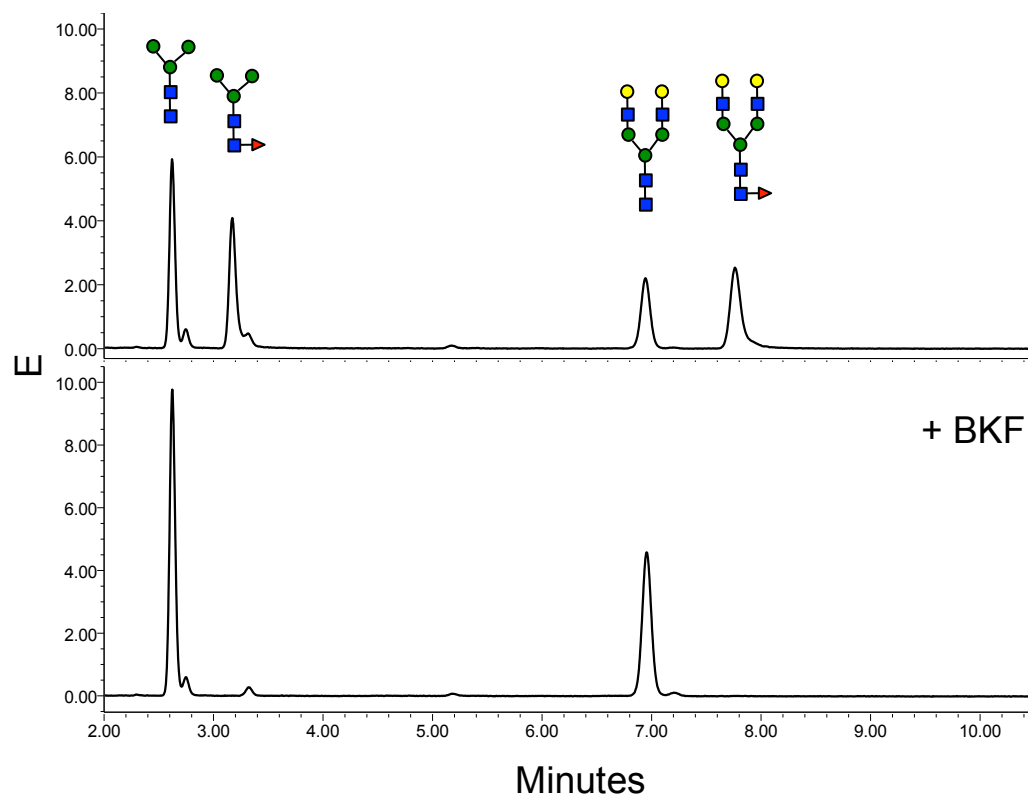

**Figure S4. UPLC-HILIC-FLR profiles of undigested vs BKF-digested M3N2, M3N2F, NA2 and NA2F N-glycans.**

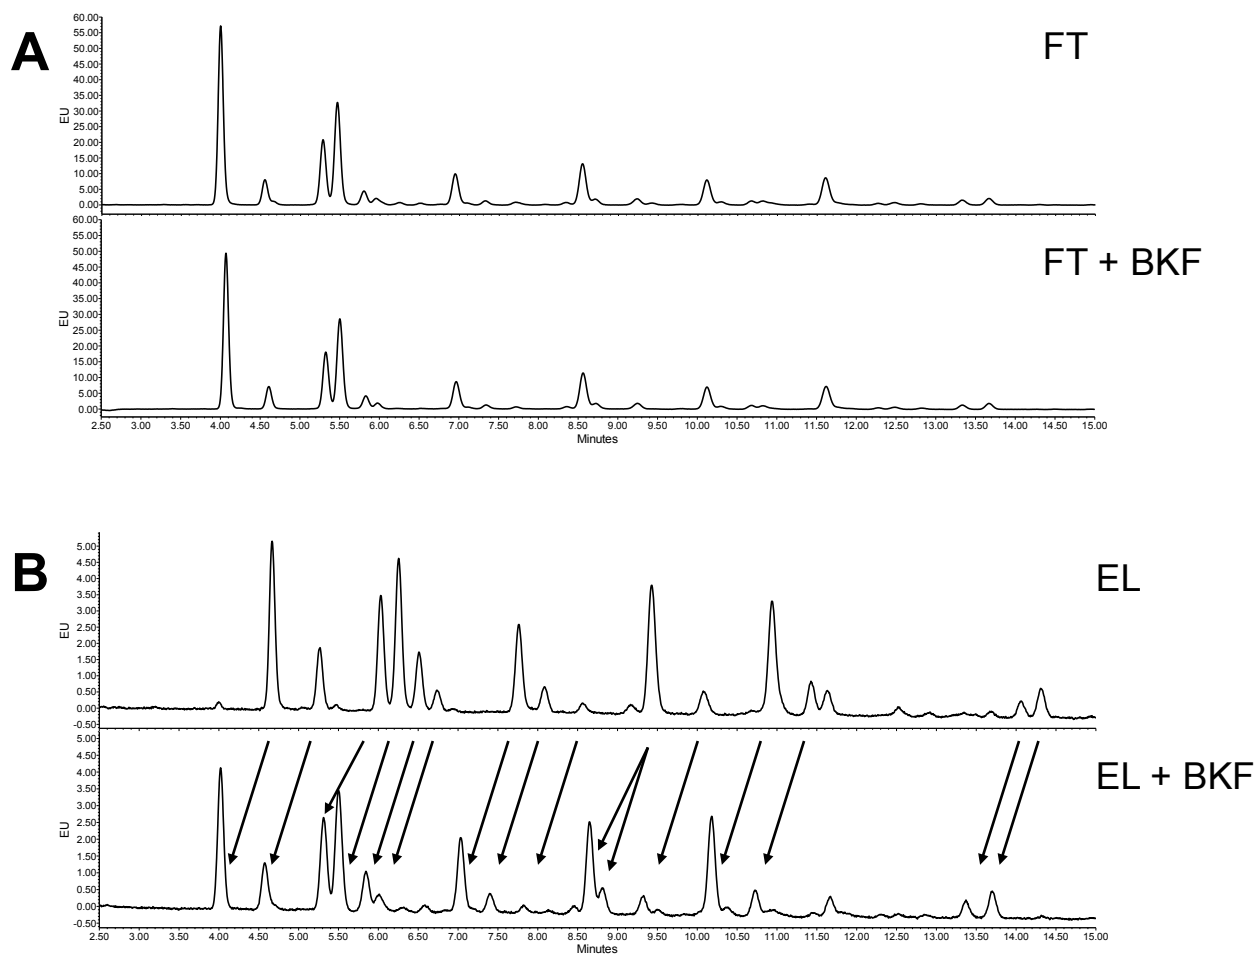

**Figure S5. UPLC-HILIC-FLR profiles of undigested vs BKF-digested N-glycans from rabbit serum IgG.** Unbound (FT) (A) and lectin-bound (EL) (B) fractions were treated with  $\alpha$ 1-2,4,6 fucosidase (BKF) and analyzed by Glycan BEH Amide HILIC chromatographic separation.

**Figure S6. Structural identification of N-glycans from rabbit serum IgG by mass spectrometry.** Identified carbohydrate compositions, observed masses and their sensitivity to BKF treatment provided in the table below (core-fucosylated structures labeled in red; non-fucosylated – in black).

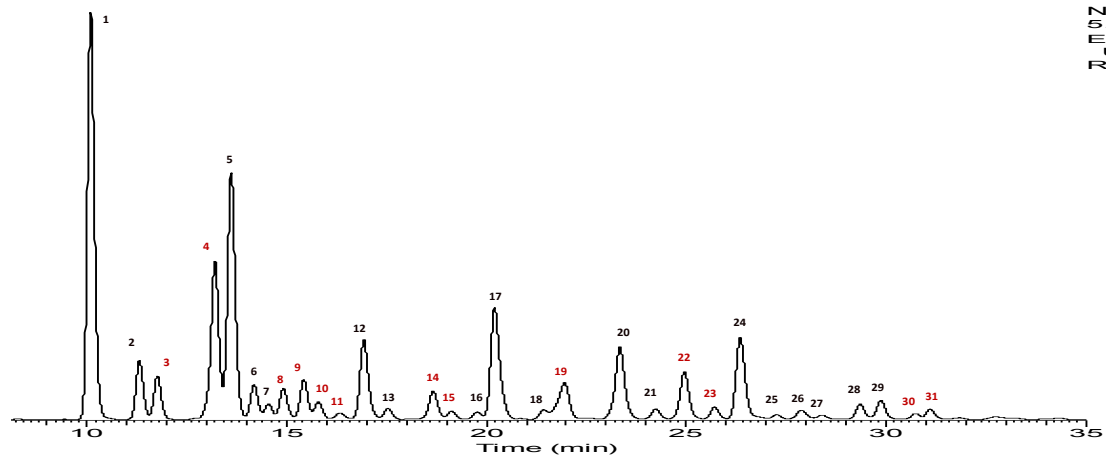

| Peak # | Composition                       | m/z [+1] <sup>‡</sup><br>theor. | m/z [+1] <sup>‡</sup><br>observed | BKF-sensitive |
|--------|-----------------------------------|---------------------------------|-----------------------------------|---------------|
| 1      | HexNAc(4)Hex(3)                   | 1437.5625                       | 1437.65                           | -             |
| 2      | HexNAc(5)Hex(3)                   | 1640.6419                       | 1640.66                           | -             |
| 3      | HexNAc(4)Hex(3)dHex(1)            | 1583.6205                       | 1583.65                           | +             |
| 4      | HexNAc(4)Hex(4)                   | 1599.6154                       | 1599.66                           | -             |
|        | HexNAc(5)Hex(3)dHex(1)            | 1786.6998                       | 1786.75                           | +             |
| 5      | HexNAc(4)Hex(4)                   | 1599.6154                       | 1599.66                           | -             |
| 6      | HexNAc(5)Hex(4)                   | 1802.6947                       | 1802.73                           | -             |
| 7      | HexNAc(5)Hex(4)                   | 1802.6947                       | 1802.73                           | -             |
| 8      | HexNAc(4)Hex(4)dHex(1)            | 873.3403*                       | 873.36*                           | +             |
| 9      | HexNAc(4)Hex(4)dHex(1)            | 873.3403*                       | 873.36*                           | +             |
| 10     | HexNAc(5)Hex(4)dHex(1)            | 974.88*                         | 974.95*                           | +             |
| 11     | HexNAc(5)Hex(4)dHex(1)            | 974.88*                         | 974.95*                           | +             |
| 12     | HexNAc(4)Hex(5)                   | 1761.6682                       | 1761.75                           | -             |
| 13     | HexNAc(5)Hex(5)                   | 1964.7476                       | 1964.84                           | -             |
| 14     | HexNAc(4)Hex(5)dHex(1)            | 954.367*                        | 954.37*                           | +             |
| 15     | HexNAc(5)Hex(5)dHex(1)            | 1055.9064*                      | 1055.96*                          | +             |
| 16     | ?                                 | ?                               | 1055.46*                          | -             |
| 17     | HexNAc(4)Hex(4)Neu5Gc(1)          | 953.8565*                       | 953.87*                           | -             |
| 18     | HexNAc(5)Hex(4)Neu5Gc(1)          | 1055.3962*                      | 1055.46*                          | -             |
| 19     | HexNAc(4)Hex(4)Neu5Gc(1)dHex(1)   | 1026.8854*                      | 1026.95*                          | +             |
|        | HexNAc(5)Hex(4)Neu5Gc(1)dHex(1)   | 1128.4251*                      | 1128.46*                          | +             |
| 20     | HexNAc(4)Hex(5)Neu5Gc(1)          | 1034.8829*                      | 1034.87*                          | -             |
| 21     | HexNAc(5)Hex(5)Neu5Gc(1)          | 1136.4226*                      | 1136.42*                          | -             |
| 22     | HexNAc(4)Hex(5)Neu5Gc(1)dHex(1)   | 1107.9119*                      | 1107.96*                          | +             |
|        | HexNAc(4)Hex(5)Neu5Ac(2)          | 1172.4332*                      | 1172.46*                          | -             |
| 23     | HexNAc(5)Hex(5)Neu5Gc(1)dHex(1)   | 1209.4515*                      | 1209.47*                          | +             |
| 24     | HexNAc(4)Hex(5)Neu5Ac(2)          | 1172.4332*                      | 1172.46*                          | -             |
| 25     | HexNAc(5)Hex(6)Neu5Gc(1)          | 1217.449*                       | 1217.47*                          | -             |
| 26     | HexNAc(4)Hex(5)Neu5Ac(1)Neu5Gc(1) | 1180.4306*                      | 1180.46*                          | -             |
| 27     | HexNAc(5)Hex(5)Neu5Ac(1)Neu5Gc(1) | 1281.9703*                      | 1281.97*                          | -             |
| 28     | HexNAc(4)Hex(5)Neu5Gc(2)          | 1188.4281*                      | 1188.46*                          | -             |
| 29     | HexNAc(5)Hex(5)Neu5Gc(2)          | 1289.9678*                      | 1289.97*                          | -             |
| 30     | HexNAc(4)Hex(5)Neu5Gc(2)dHex(1)   | 1261.457*                       | 1261.47*                          | +             |
| 31     | HexNAc(5)Hex(5)Neu5Gc(2)dHex(1)   | 1362.9967*                      | 1362.97*                          | +             |

<sup>‡</sup>2AB-labeled glycans

\*m/z [+2]



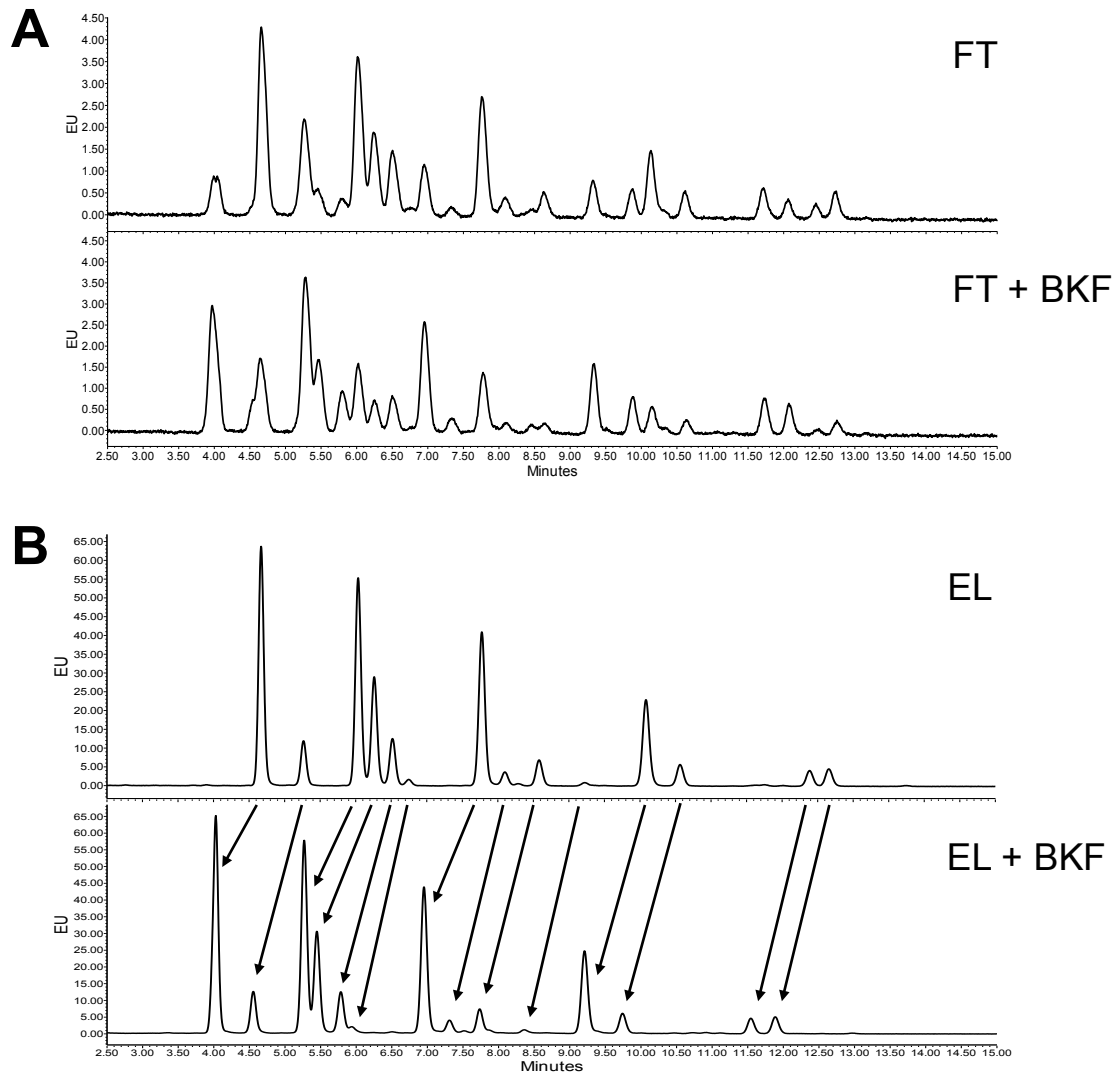

**Figure S7. UPLC-HILIC-FLR profiles of BKF-digested vs undigested N-glycans from human serum IgG.** (Unbound (FT) (A) and lectin-bound (EL) (B) fractions were treated with  $\alpha$ -1,2,4,6 fucosidase (BKF) and analyzed by Glycan BEH Amide HILIC chromatographic separation.

**Figure S8. Structural identification of N-glycans from human serum IgG by mass spectrometry.** Identified carbohydrate compositions, observed masses and their sensitivity to BKF treatment provided in the table below (core-fucosylated structures labeled in red; non-fucosylated – in black).

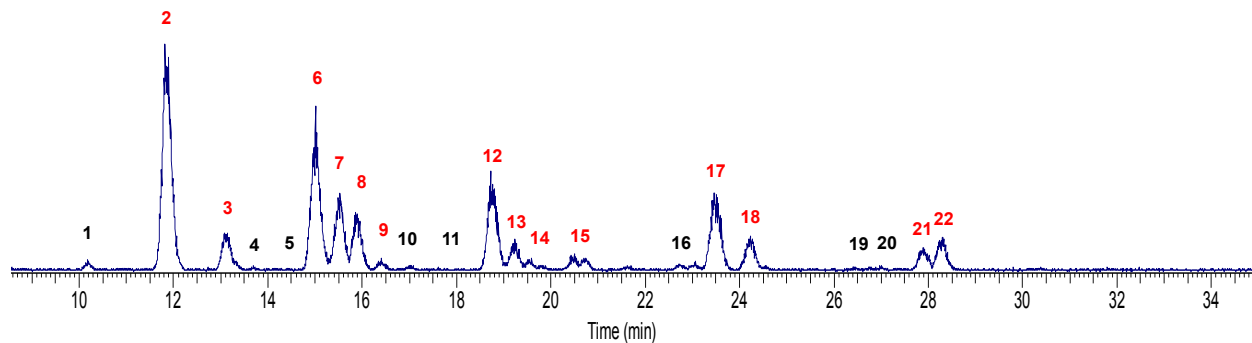

NL:  
4.58E4  
Base Peak  
MS hs\_igg

| Peak # | Composition                     | m/z [+1] <sup>‡</sup><br>theor. | m/z [+1] <sup>‡</sup><br>observed | BKF-sensitive |
|--------|---------------------------------|---------------------------------|-----------------------------------|---------------|
| 1      | HexNAc(4)Hex(3)                 | 1437.5625                       | 1437.65                           | -             |
| 2      | HexNAc(4)Hex(3)dHex(1)          | 1583.6205                       | 1583.65                           | +             |
|        | HexNAc(5)Hex(3)                 | 1640.6419                       | 1640.66                           | -             |
| 3      | HexNAc(5)Hex(3)dHex(1)          | 1786.6998                       | 1786.75                           | +             |
|        | HexNAc(4)Hex(4)                 | 1599.6154                       | 1599.66                           | -             |
| 4      | HexNAc(4)Hex(4)                 | 1599.6154                       | 1599.66                           | -             |
| 5      | HexNAc(5)Hex(4)                 | 1802.6947                       | 1802.75                           | -             |
| 6      | HexNAc(4)Hex(4)dHex(1)          | 1745.6733                       | 1745.75                           | +             |
|        | HexNAc(5)Hex(4)                 | 1802.6947                       | 1802.75                           | -             |
| 7      | HexNAc(4)Hex(4)dHex(1)          | 1745.6733                       | 1745.75                           | +             |
| 8      | HexNAc(5)Hex(4)dHex(1)          | 1948.7527                       | 1948.84                           | +             |
| 9      | HexNAc(5)Hex(4)dHex(1)          | 1948.7527                       | 1948.68                           | +             |
| 10     | HexNAc(4)Hex(5)                 | 1761.6682                       | 1761.75                           | -             |
| 11     | HexNAc(5)Hex(5)                 | 982.8774*                       | 982.87*                           | -             |
| 12     | HexNAc(4)Hex(5)dHex(1)          | 1907.7261                       | 1907.76                           | +             |
|        | HexNAc(3)Hex(4)Neu5Ac(1)dHex(1) | 917.3483*                       | 917.36*                           | +             |
|        | HexNAc(5)Hex(4)Neu5Ac(1)        | 1047.3987*                      | 1047.37*                          | -             |
| 13     | HexNAc(5)Hex(5)dHex(1)          | 1055.9064*                      | 1055.96*                          | +             |
|        | HexNAc(5)Hex(4)Neu5Ac(1)        | 1047.3987*                      | 1047.46*                          | -             |
| 14     | HexNAc(4)Hex(4)Neu5Ac(1)dHex(1) | 1018.8880*                      | 1018.87*                          | +             |
|        | HexNAc(5)Hex(4)Neu5Ac(1)dHex(1) | 1120.4277*                      | 1120.46*                          | +             |
| 15     | HexNAc(5)Hex(4)Neu5Ac(1)dHex(1) | 1120.4277*                      | 1120.46*                          | +             |
|        | HexNAc(4)Hex(5)Neu5Ac(1)        | 1026.8854*                      | 1026.87*                          | -             |
| 16     | HexNAc(5)Hex(5)Neu5Ac(1)        | 1128.4251*                      | 1128.46*                          | -             |
| 17     | HexNAc(4)Hex(5)Neu5Ac(1)dHex(1) | 1099.9144*                      | 1099.96*                          | +             |
| 18     | HexNAc(5)Hex(5)Neu5Ac(1)dHex(1) | 1201.4541*                      | 1201.46*                          | +             |
| 19     | HexNAc(4)Hex(5)Neu5Ac(2)        | 1172.4332*                      | 1172.38*                          | -             |
| 20     | HexNAc(5)Hex(5)Neu5Ac(2)        | 1273.9728*                      | 1273.97*                          | -             |
| 21     | HexNAc(4)Hex(5)Neu5Ac(2)dHex(1) | 1245.4621*                      | 1245.47*                          | +             |
| 22     | HexNAc(5)Hex(5)Neu5Ac(2)dHex(1) | 1347.0018*                      | 1347.06*                          | +             |

<sup>‡</sup>2AB-labeled glycans ,

\*m/z [+2]
